# Supplementary material for: Genome-wide annotation of the soybean WRKY family and functional characterization of genes involved in response to Phakopsora pachyrhizi infection
Source: PubMed Central journal article supplement (PMC4172953; doi:10.1186/s12870-014-0236-0), 2014-09-10
Supplement: 12870_2014_236_MOESM3_ESM.pdf [file 12870_2014_236_MOESM3_ESM.pdf]

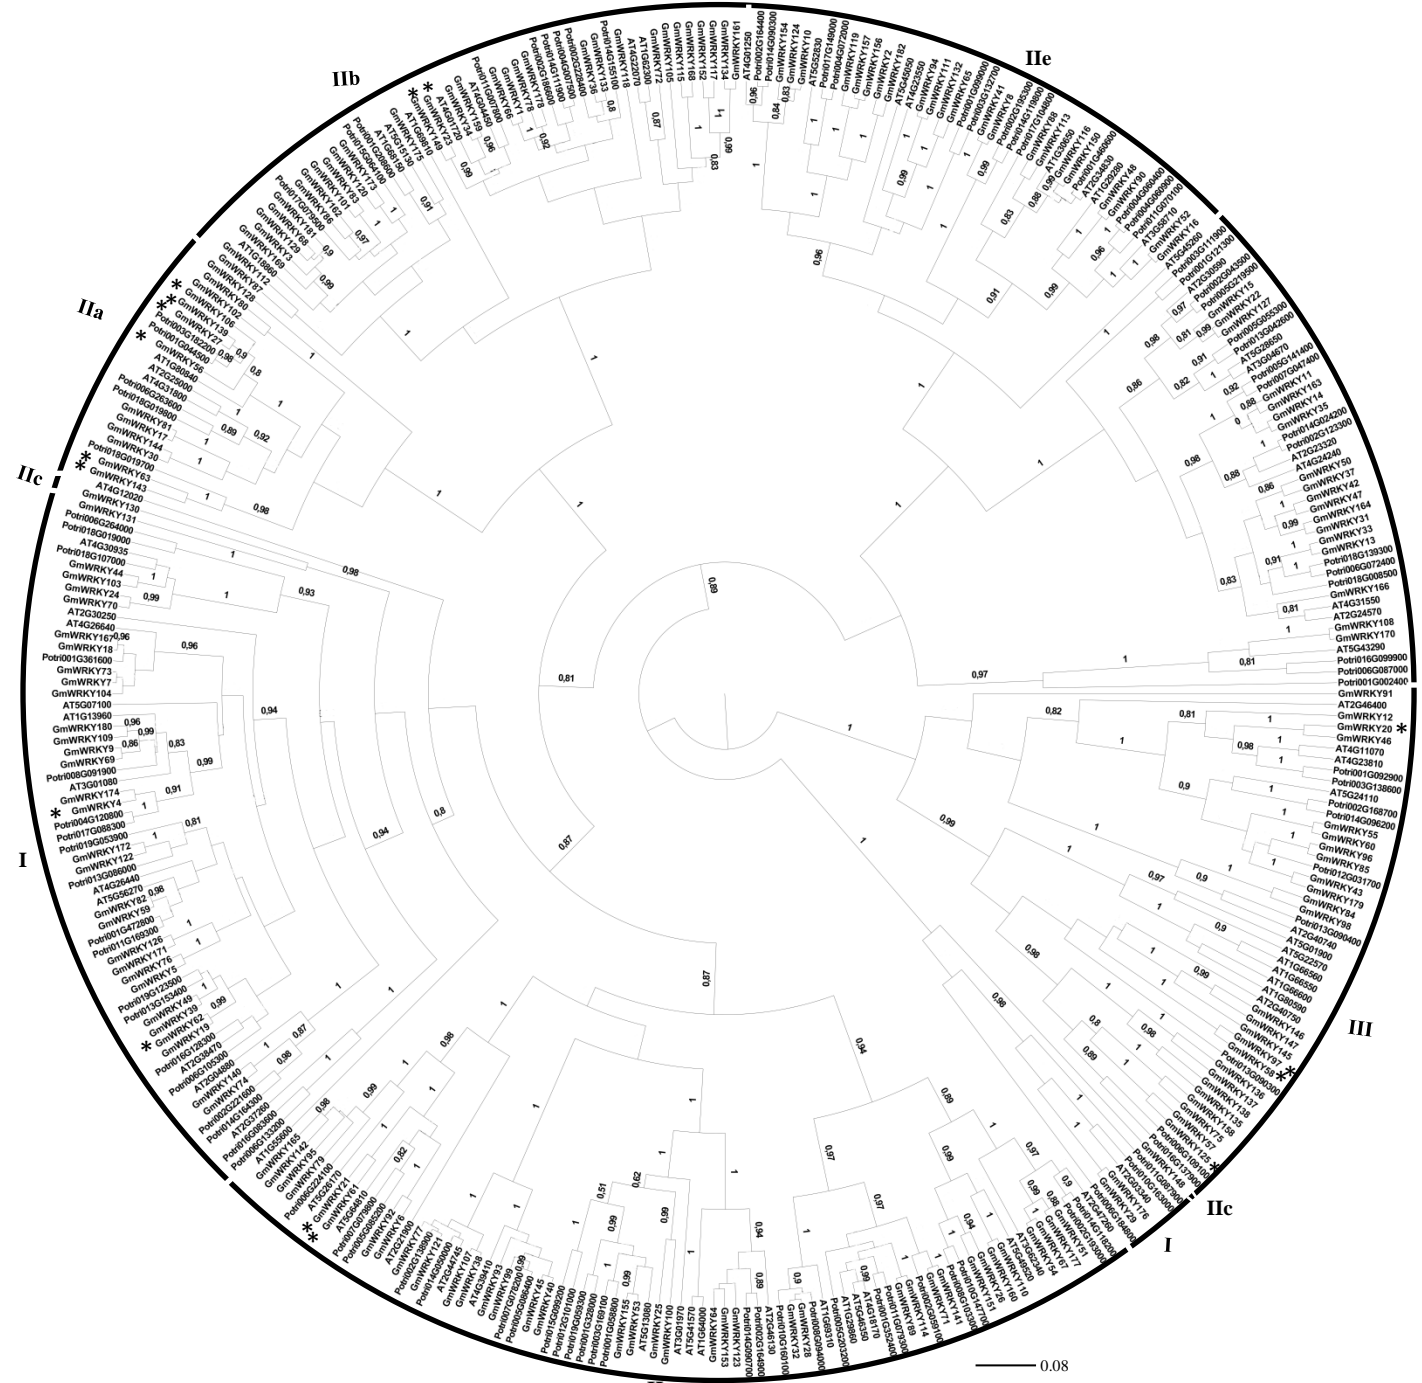

IIId

III

IIIc

I

0.08

IIc
